# Supplementary material for: Noncovalent interactions induced self-association in anthraquinone-iron aqueous redox flow batteries
Source: Royal Society of Chemistry journal article supplement (doi:10.1039/d1se01895g), 2022-01-01
Supplement: d1se01895g1.pdf [file d1se01895g1.pdf]

## Supplementary Information

# Noncovalent Interactions Induced Self-Association in Anthraquinone-Iron Aqueous Redox Flow Batteries

*Lixing Xia<sup>1</sup>, Yujing Zhang<sup>2</sup>, Heng Zhang<sup>1</sup>, Shan Jiang<sup>1</sup>, Qianglong Lv<sup>2</sup>, Wenbo Huo<sup>2</sup>, Fengming Chu<sup>2</sup>, Fuzhi Wang<sup>1</sup>, Hui Li<sup>2</sup>,\* and Zhan'ao Tan<sup>2</sup>,\**

<sup>1</sup> State Key Laboratory of Alternate Electrical Power System with Renewable Energy Sources, North China Electric Power University, Beijing 102206, China.

<sup>2</sup> Beijing Advanced Innovation Center for Soft Matter Science and Engineering, Beijing University of Chemical Technology, Beijing 100029, China.

### Corresponding Author

\* [tanzhanao@mail.buct.edu.cn](mailto:tanzhanao@mail.buct.edu.cn)

\* [hli@mail.buct.edu.cn](mailto:hli@mail.buct.edu.cn)

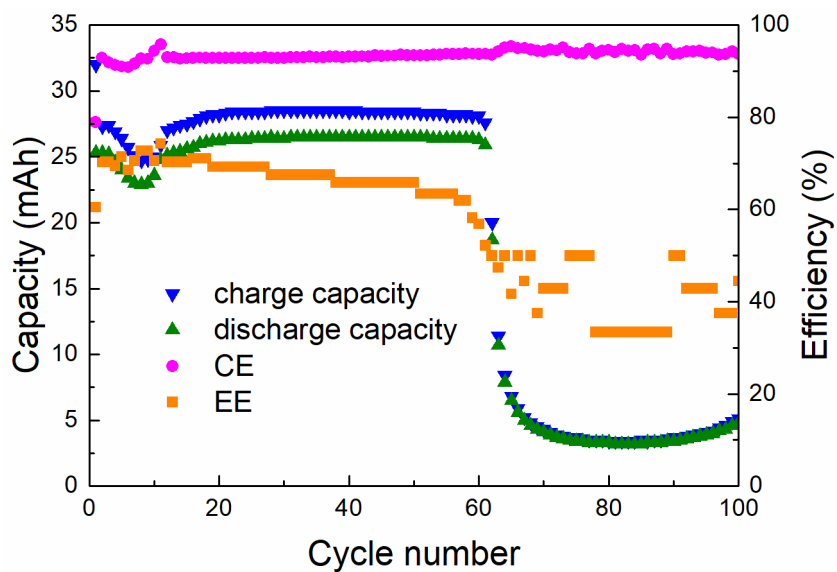

**Figure S1.** The anthraquinone-iron RFB was tested under  $40 \text{ mA}\cdot\text{cm}^{-2}$  without using glycine as the acid additive.

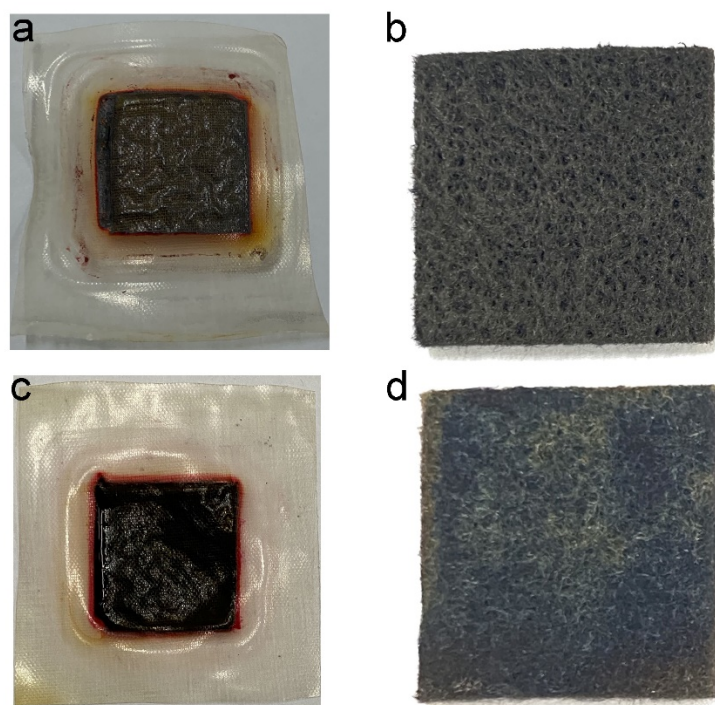

**Figure S2.** Images of (a) membrane and (b) carbon felt on the positive side after cycling in 0.1 M anthraquinone flow battery. Photographs of (c) membrane and (d) carbon felt on the positive side after cycling in 0.5 M anthraquinone flow battery.

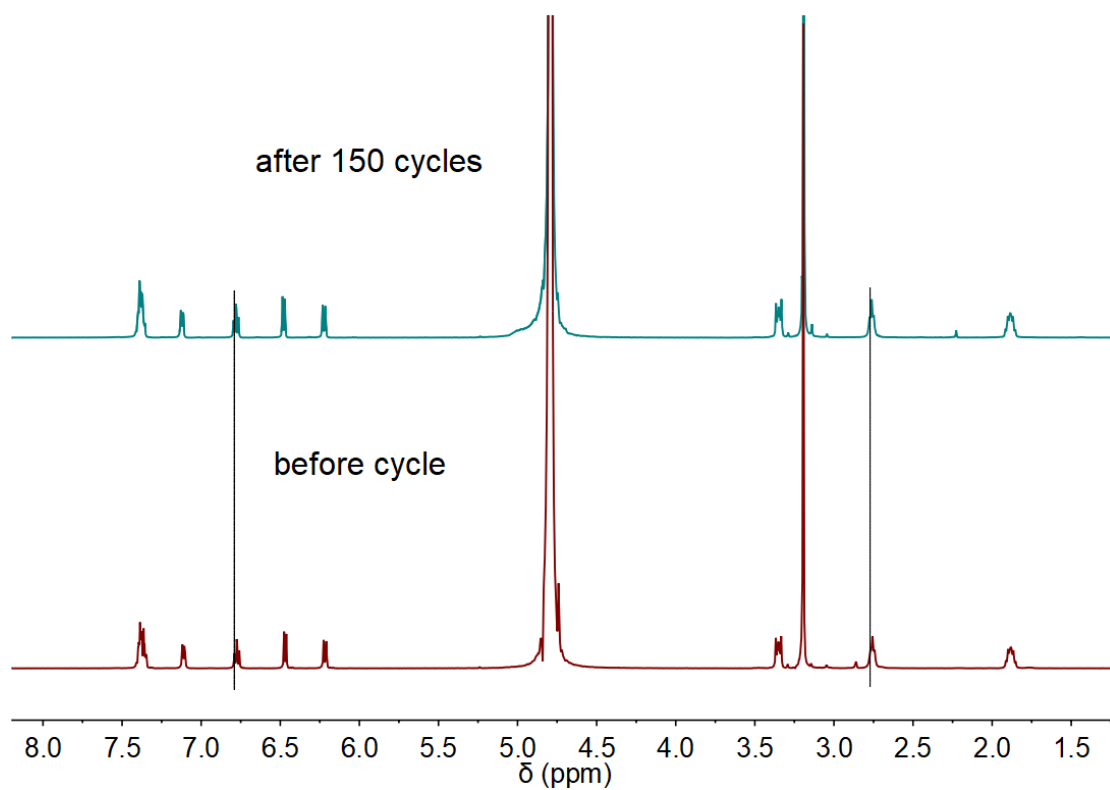

**Figure S3.** <sup>1</sup>H NMR spectrum (500 MHz) of 28  $\mu$ L negative electrolyte in 0.55 mL D<sub>2</sub>O before cycle (bottom) and after 150 cycles (top). The chemical shifts moved downfield slightly after 150 cycles, suggesting the concentration decreased accordingly.

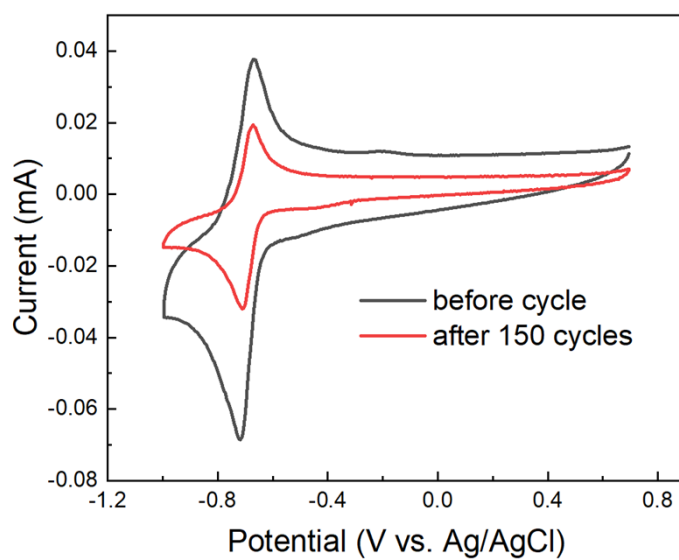

**Figure S4.** CV curves of 100  $\mu$ L negative electrolyte dissolving in 50 mL 1 M KCl before (black line) and after 150 cycles (red line).

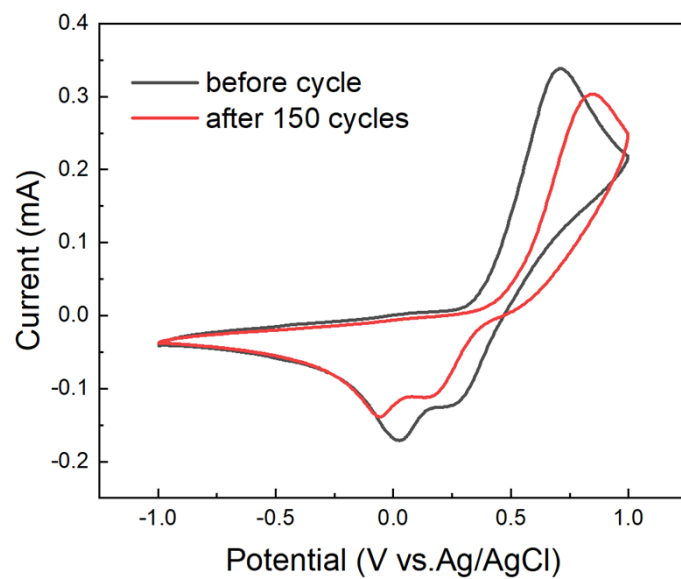

**Figure S5.** CV curves of 1112  $\mu\text{L}$  positive electrolyte in 50 mL 1 M KCl before (black line) and after 150 cycles (red line).

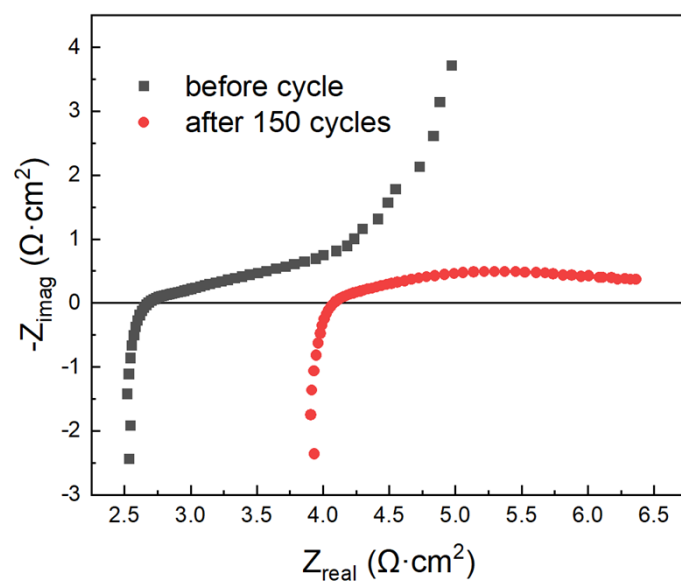

**Figure S6.** Nyquist plot of the 0.5 M anthraquinone-iron RFB before (black dots) and after cycling (red dots). The frequency arranges from 500 kHz to 1 Hz.

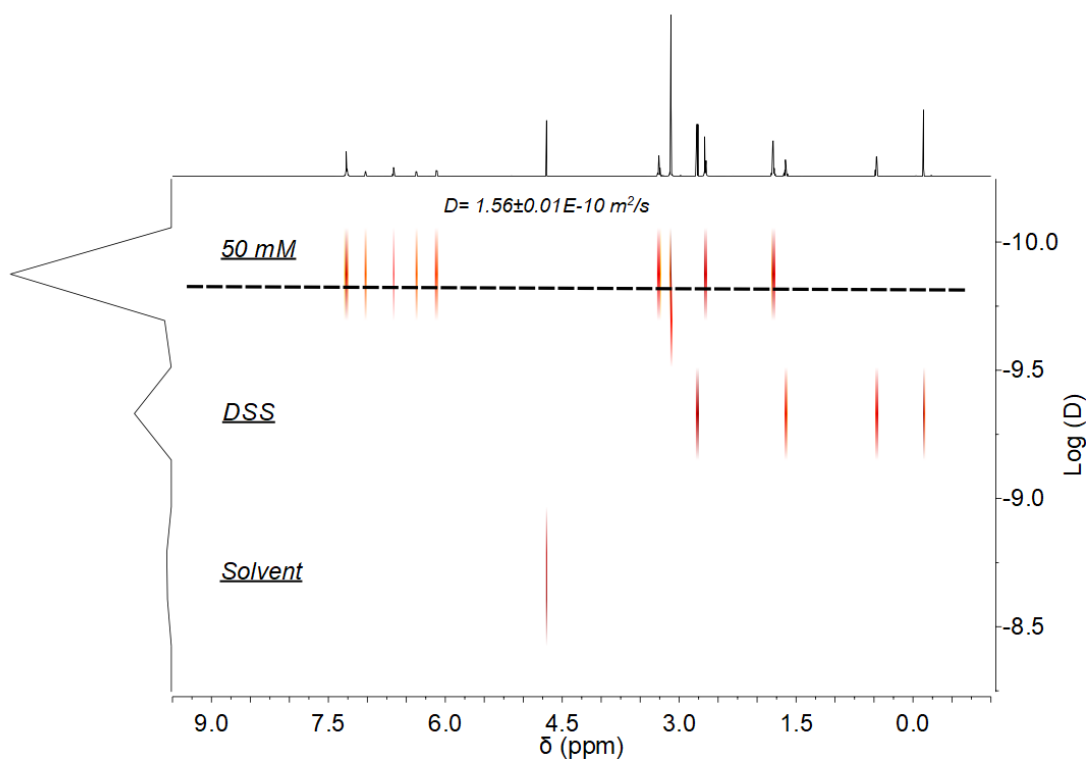

**Figure S7.**  $^1\text{H}$  DOSY (600 MHz) spectrum of 50 mM 1-DPAQCl in  $\text{D}_2\text{O}$  at 298 K.

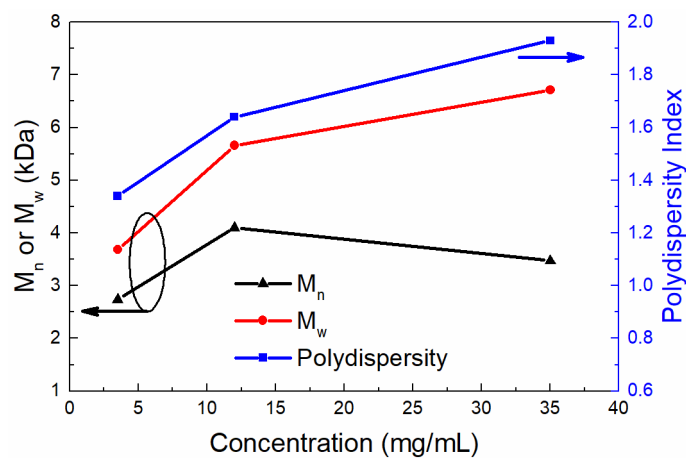

**Figure S8.** Number-average molecular weight ( $M_n$ ), weight-average molecular weight ( $M_w$ ), and polydispersity index determined by GPC versus the concentration at 3.5, 12, 35  $\text{mg}\cdot\text{mL}^{-1}$ .

**Figure S8** displayed that  $M_w$  increased with the concentration ranging from 3.5 to 35  $\text{mg}\cdot\text{mL}^{-1}$ . However,  $M_n$  first increased to 4.10 kDa when the concentration was 12  $\text{mg}\cdot\text{mL}^{-1}$ , and then decreased to 3.47 kDa as the concentration was 35  $\text{mg}\cdot\text{mL}^{-1}$ . We attribute this trend to the polydispersity broadening.
